# Supplementary material
Source: PubMed Central journal article supplement (PMC7887697)
Supplement: NIHMS1669704-supplement-1.pdf [file NIHMS1669704-supplement-1.pdf]

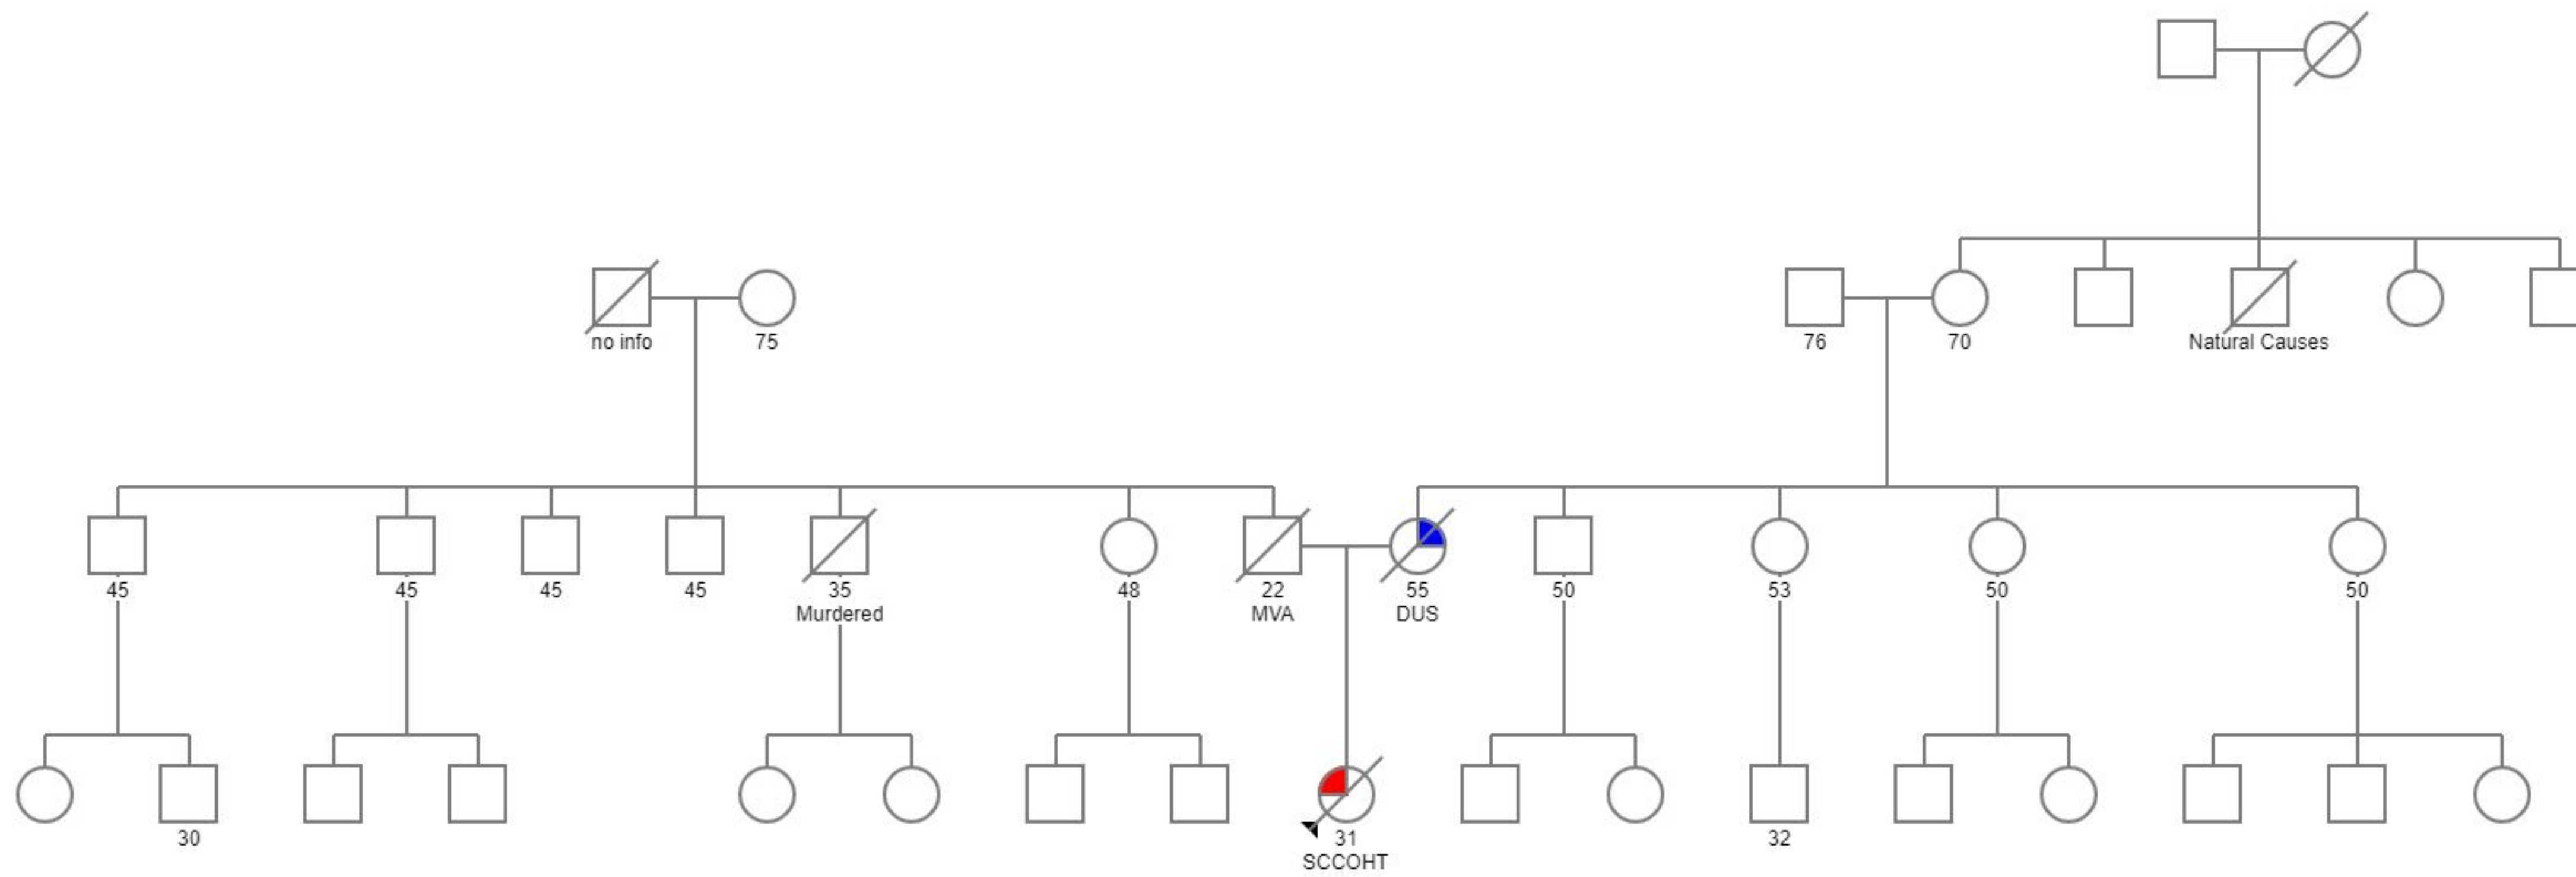

**Supplementary Figure 1: Three generation family pedigree**

a.

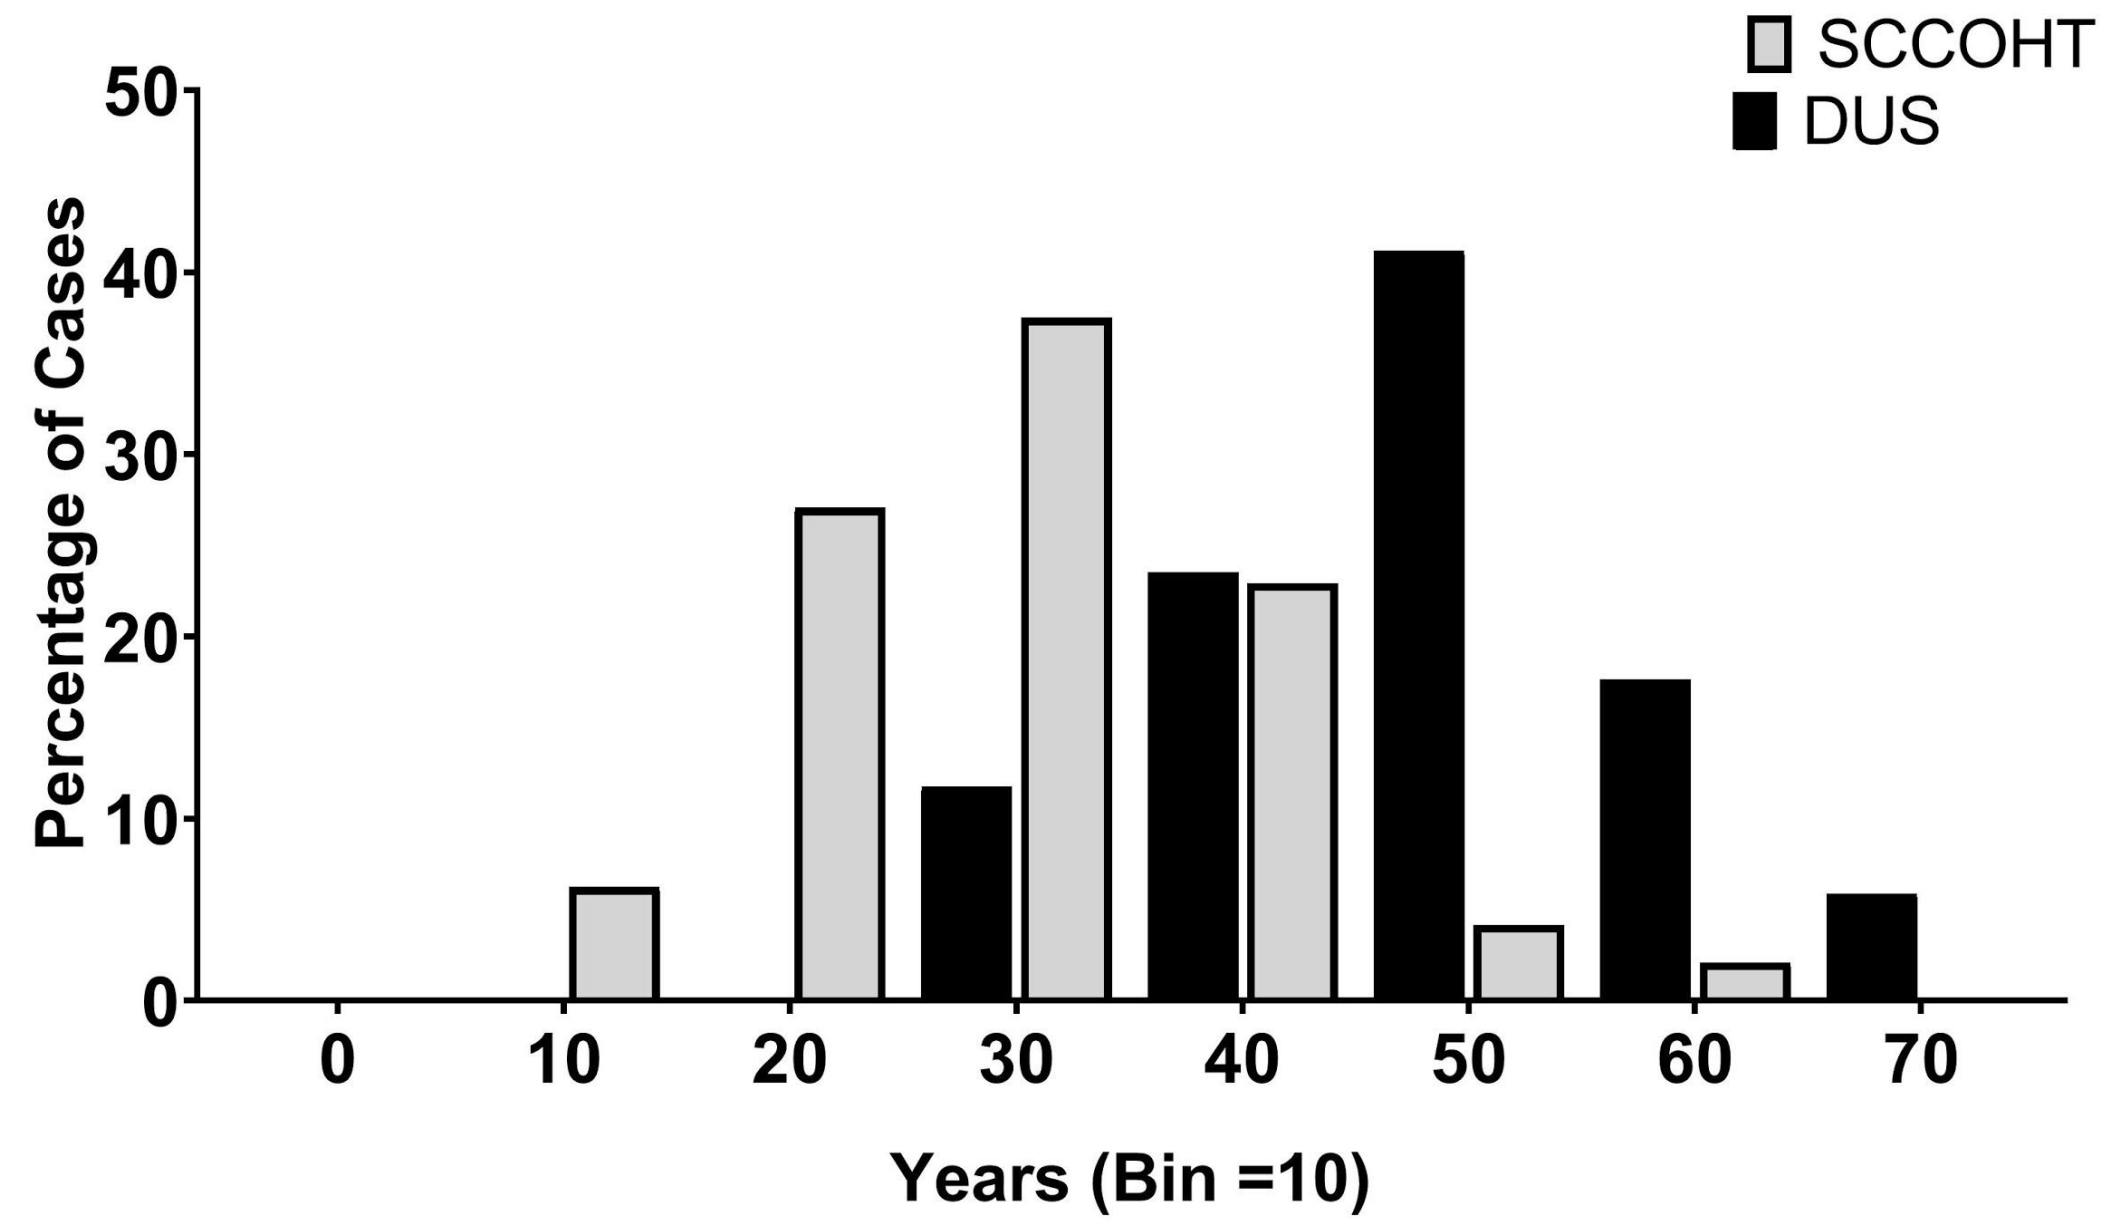

b.

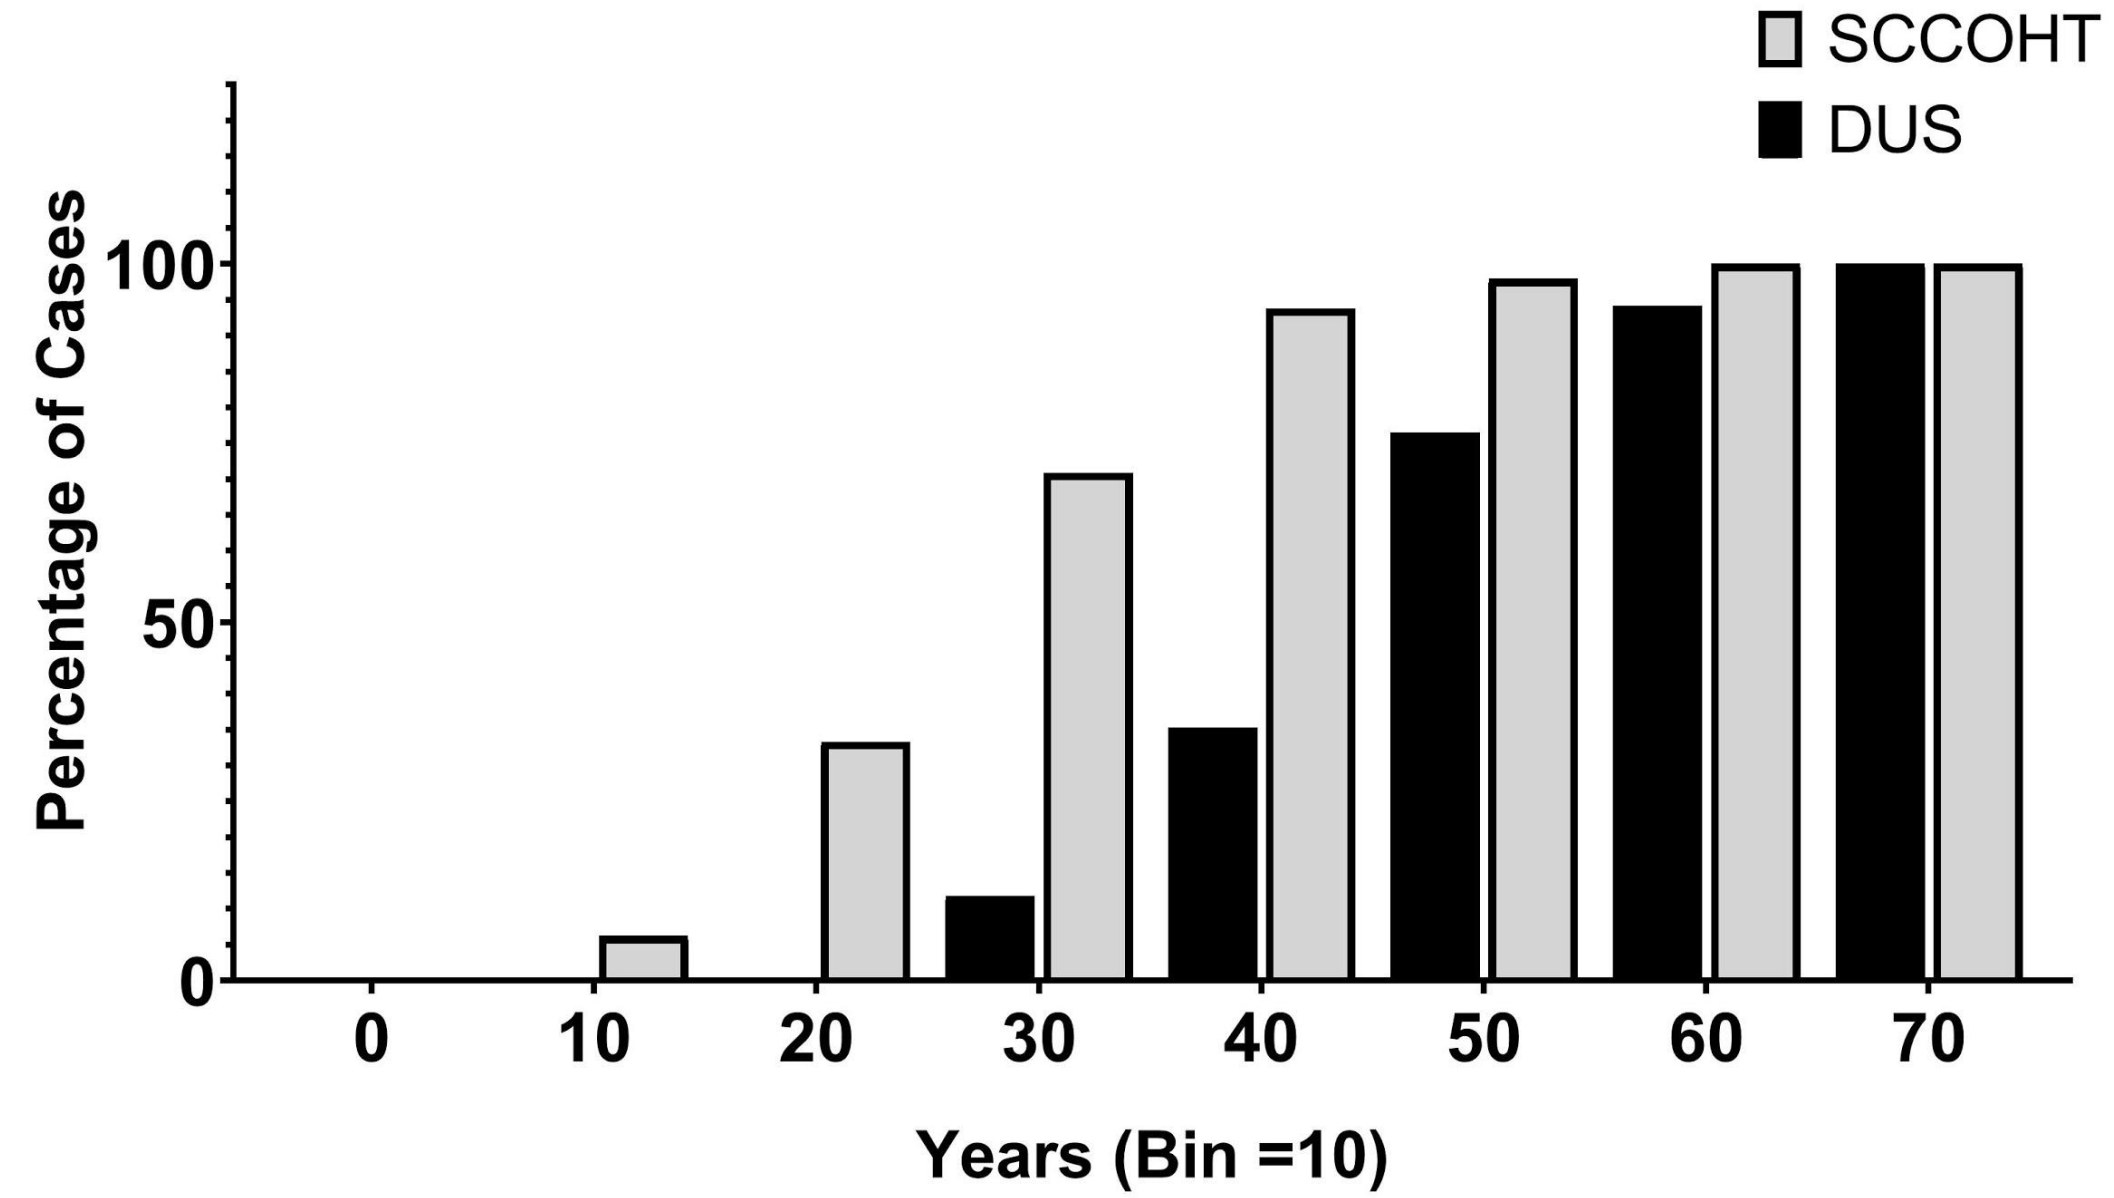

Supplementary Figure 2: Histogram of SMARCA4 mutations

| Age | Parity | Presenting Symptoms      | Diagnosis | Stage | Tumor Size | Notable Labs                                | Surgery                       | Chemotherapy                                                                  | Overall survival | Immunohistochemistry Characterization                                                                                                                                                                                                                 |
|-----|--------|--------------------------|-----------|-------|------------|---------------------------------------------|-------------------------------|-------------------------------------------------------------------------------|------------------|-------------------------------------------------------------------------------------------------------------------------------------------------------------------------------------------------------------------------------------------------------|
| 31  | 0      | Pelvic Pain and fullness | SCCOHT    | IIIB  | 19cm       | CA-125: 133, LDH: 621, normal serum calcium | Ex-lap, LSO, omentectomy, LND | Cisplatin/etoposide x 3, Carboplatin/Paclitaxel x 1, Pembrolizumab x 2 cycles | 175 Days         | <b>focally positive:</b> cytokeratin cocktail, Sall4, Glypican 3, GATA3, calretinin<br><b>negative:</b> AFP, CD30, HCG, Oct3/4, Inhibin, EMA, Pax-8                                                                                                   |
| 55  | 1      | Vaginal bleeding         | DUS       | IVB   | 9cm        | CA-125: 100.7                               | Ex-lap, TAH, BSO, omentectomy | AIM 75/9 x 4 (20% dose reduction after cycle 2)                               | 267 Days         | <b>positive:</b> p16, WT-1, intact mismatch repair proteins<br><b>negative:</b> CD10, pan-keratin, ER, PR, synaptophysin, chromogranin, inhibin, HMB45, MART1, actin, desmin, and CD117, BCOR, cytokeratin cocktail (AE1/3&CAM5.2), EMA, BCL-1, BRG-1 |

**Supplementary Table 1: Clinical Data Summary**

| <b>Gene</b> | <b>Variants</b> |
|-------------|-----------------|
| CIC         | A582V           |
| DNM2        | V64I            |
| DOT1L       | L1306F          |
| FAM123B     | H104R           |
| FOXP1       | P168H           |
| HIST1H2AL   | S2L             |
| JAK2        | T514M           |
| JARID2      | N226S           |
| MYO18A      | R1059C          |
| PLCG2       | A136T           |

**Supplementary Table 2. Detected variations of unknown significance**

| SMARCA4 Alteration                        | SGZ prediction algorithm | Case                        | Mutation          | Protein change       | Mutation type     | Protein Expression | Origin   | Inheritance of germline mutations |                       |
|-------------------------------------------|--------------------------|-----------------------------|-------------------|----------------------|-------------------|--------------------|----------|-----------------------------------|-----------------------|
| p.Arg1077* and splice site c.2438+1G>A    | Somatic                  | Le Loarer (2015)_SCCOHT7    | c.3229C>T         | p.Arg1077*           | Stop              | Loss               | Unknown  |                                   |                       |
|                                           |                          | Le Loarer (2015)_SCCOHT9    | c.3229C>T         | p.Arg1077*           | Stop              | Loss               | Unknown  |                                   |                       |
|                                           |                          | Unpublished_NF13            | c.3229C>T         | p.Arg1077*           | Stop              | Loss               | Germline | Unknown                           |                       |
|                                           |                          | SCCOHT-1 (Cell line)        | c.3229C>T         | p.Arg1077*           | Stop              | Loss               | Unknown  |                                   |                       |
|                                           |                          | BIN-67 (Cell line)          | c.2438+1 G>A      | NA                   | Splice            | Loss               | Unknown  |                                   |                       |
| p.Glu1300_Asn1303del                      | Germline                 | Jelinic (2014)_107          | c.3896_3907 del12 | p.Glu1300_Asn1303del | In-frame deletion | Unknown            | Somatic  |                                   |                       |
| splice site 1119-1G>C and homozygous loss | Germline                 | Unpublished_Case27          | c.1119-1G>C       | NA                   | Splice            | Loss               | Somatic  |                                   |                       |
| splice site 2859+1G>C                     | Germline                 | Unpublished_NF21            | c.2859+1G>C       | NA                   | Splice            | Loss               | Somatic  |                                   |                       |
|                                           |                          |                             | c.196C>T          | p.Gln66*             | Stop              | Loss               |          |                                   |                       |
|                                           |                          | Unpublished_FA7a            | c.2859+1G>C       | NA                   | Splice            | Loss               | Germline |                                   | Inherited from father |
|                                           |                          | Unpublished_FA7b            | c.2859+1G>C       | NA                   | Splice            | Loss               | Germline | Inherited from father             |                       |
| p.Lys585fs*27 and p.Arg1093*              | Germline                 | Kupryjanczyk (2014)_PJK1233 | c.3277C>T         | p.Arg1093*           | Stop              | Loss               | Unknown  |                                   |                       |
|                                           |                          |                             | c.2184_2206del    | p.Gln729fs           | Frameshift        | Loss               |          |                                   |                       |
|                                           |                          | Unpublished_NF10            | c.3277C>T         | p.Arg1093*           | Stop              | Loss               | Germline |                                   | Unknown               |
|                                           |                          | Ramos (2014)_DAH457         | c.3277C>T         | p.Arg1093*           | Stop              | Unknown            | Unknown  |                                   |                       |

|                                    |               |                             |                 |                  |            |           |          |                       |
|------------------------------------|---------------|-----------------------------|-----------------|------------------|------------|-----------|----------|-----------------------|
|                                    |               | Jelinic (2014)_106          | c.1165_1165delC | p.Ser391Profs*20 | Frameshift | Loss      |          | Somatic               |
|                                    |               |                             | c.3277C>T       | p.Arg1093*       | Stop       | Loss      |          |                       |
| p.Arg979*                          | Somatic       | Ramos (2014)_SCCO-008       | c.2935C>T       | p.Arg979*        | Stop       | Unknown   | Germline | Unknown               |
| p.Arg381* and p.Ala573fs*40        | Germline      | Witkowski (2014)_UN7        | c.1141C>T       | p.Arg381*        | Stop       | Loss      | Germline | Unknown               |
| splice site 2859+1G>A              | Somatic       | Jelinic (2014)_112          | c.2859+1G>A     | NA               | Splice     | Equivocal |          | Somatic               |
|                                    |               | Jelinic (2014)_106          | c.1165_1165delC | p.Ser391Profs*20 | Frameshift | Loss      |          | Somatic               |
|                                    |               |                             | c.3277C>T       | p.Arg1093*       | Stop       | Loss      |          |                       |
| p.Arg1093*                         | Somatic       | Ramos (2014)_DAH457         | c.3277C>T       | p.Arg1093*       | Stop       | Unknown   |          | Unknown               |
|                                    |               | Unpublished_NF10            | c.3277C>T       | p.Arg1093*       | Stop       | Loss      | Germline | Unknown               |
|                                    |               | Kupryjanczyk (2014)_PJK1233 | c.3277C>T       | p.Arg1093*       | Stop       | Loss      |          | Unknown               |
|                                    |               |                             | c.2184_2206del  | p.Gln729fs       | Frameshift | Loss      |          |                       |
|                                    |               | Unpublished_NF21            | c.2859+1G>C     | NA               | Splice     | Loss      |          | Somatic               |
|                                    |               |                             | c.196C>T        | p.Gln66*         | Stop       | Loss      |          |                       |
| p.Gln66* and splice site 2859+1G>C | Somatic       | Unpublished_FA7a            | c.2859+1G>C     | NA               | Splice     | Loss      | Germline | Inherited from father |
|                                    |               | Unpublished_FA7b            | c.2859+1G>C     | NA               | Splice     | Loss      | Germline | Inherited from father |
|                                    |               | Jelinic (2014)_106          | c.1165_1165delC | p.Ser391Profs*20 | Frameshift | Loss      |          | Somatic               |
| p.Arg1093*                         | Indeterminate |                             | c.3277C>T       | p.Arg1093*       | Stop       | Loss      |          |                       |
|                                    |               | Ramos                       | c.3277C>T       | p.Arg1093*       | Stop       | Unknown   |          | Unknown               |

|                                |                    |            |            |      |          |         |
|--------------------------------|--------------------|------------|------------|------|----------|---------|
| (2014)_DAH457                  |                    |            |            |      |          |         |
| Unpublished_NF10               | c.3277C>T          | p.Arg1093* | Stop       | Loss | Germline | Unknown |
|                                | c.3277C>T          | p.Arg1093* | Stop       | Loss | Unknown  |         |
| Kupryjanczyk<br>(2014)_PJK1233 | c.2184_2206<br>del | p.Gln729fs | Frameshift | Loss |          |         |

---

**Supplementary Table 3. Previously reported mutations**
